# Supplementary material for: Kinetico–mechanistic studies of C–H bond activation on new Pd complexes containing N,N′-chelating ligands
Source: Royal Society of Chemistry journal article supplement (doi:10.1039/b415613g), 2004-11-24

## **Kinetico–mechanistic studies of C–H bond activation on new Pd complexes containing N,N' chelating ligands**

Isabelle Favier,<sup>a</sup> Montserrat Gómez,<sup>a</sup> Jaume Granell,<sup>a</sup> Manuel Martínez,<sup>a</sup> Xavier Solans,<sup>b</sup> and Mercè Font–Bardía<sup>b</sup>

<sup>a</sup> Departament de Química Inorgànica, Universitat de Barcelona, Martí i Franquès 1–11, E–08028 Barcelona, SPAIN.

<sup>b</sup> Departament de Mineralogia, Cristal·lografia i Dipòsits Minerals, Universitat de Barcelona, Martí i Franquès s/n, E–08028 Barcelona, SPAIN.

**Table S1.-** Values of  $k_{obs}$  for the systems studied, as a function of the starting coordination compound, temperature and pressure, in neat acetic acid unless stated;  $[Pd] = (5-10) \times 10^{-4}$  M. All the values are the average of 2 to 4 runs.

| Palladium complex    | T /°C               | P /atm | $10^4 \times k_{obs} /s^{-1}$ |
|----------------------|---------------------|--------|-------------------------------|
| <b><i>E</i>-1AcO</b> | 26                  | 1      | 0.41                          |
|                      | 30                  | 1      | 0.43                          |
|                      | 44                  | 1      | 2.8                           |
|                      | 51                  | 400    | 13                            |
|                      | 51                  | 500    | 15                            |
|                      | 51                  | 600    | 16                            |
|                      | 51                  | 800    | 17                            |
|                      | 51                  | 1100   | 20                            |
|                      | 51                  | 1400   | 21                            |
|                      | 52                  | 1      | 9.0                           |
|                      | 59                  | 1      | 14                            |
|                      | 62                  | 1      | 28                            |
|                      | 69                  | 1      | 38                            |
|                      | <b><i>E</i>-1Cl</b> | 30     | 1                             |
| 41                   |                     | 1      | 0.89                          |
| 56                   |                     | 1      | 4.9                           |
| 55                   |                     | 400    | 5.0                           |
| 55                   |                     | 500    | 5.5                           |
| 55                   |                     | 700    | 5.6                           |
| 55                   |                     | 1000   | 6.1                           |
| 55                   |                     | 1300   | 6.9                           |
| 55                   |                     | 1600   | 8.2                           |
| 68                   |                     | 1      | 15                            |
| <b><i>Z</i>-1AcO</b> | 50                  | 1      | 0.080                         |
|                      | 60                  | 1      | 0.25                          |
|                      | 70                  | 1      | 0.73                          |
|                      | 75                  | 400    | 1.3                           |
|                      | 75                  | 700    | 1.8                           |
|                      | 75                  | 1000   | 1.2                           |
|                      | 75                  | 1300   | 1.1                           |

|                              |    |      |       |
|------------------------------|----|------|-------|
|                              | 75 | 1600 | 1.5   |
|                              | 80 | 1    | 2.4   |
| <b>Z-1Cl</b>                 | 55 | 1    | 0.066 |
|                              | 70 | 1    | 0.35  |
|                              | 88 | 1    | 1.6   |
| <b>E-2AcO(M)<sup>a</sup></b> | 26 | 1    | 0.25  |
|                              | 29 | 1    | 0.23  |
|                              | 30 | 1    | 0.43  |
|                              | 30 | 1    | 0.25  |
|                              | 40 | 1    | 1.3   |
|                              | 44 | 1    | 2.8   |
|                              | 50 | 1    | 4.3   |
|                              | 50 | 400  | 7.9   |
|                              | 50 | 600  | 9.5   |
|                              | 50 | 750  | 9.9   |
|                              | 50 | 800  | 12    |
|                              | 50 | 1100 | 13    |
|                              | 50 | 1250 | 14    |
|                              | 50 | 1400 | 18    |
|                              | 50 | 1500 | 20    |
|                              | 52 | 1    | 9.0   |
|                              | 59 | 1    | 20    |
|                              | 60 | 1    | 13    |
|                              | 62 | 1    | 28    |
|                              | 65 | 1    | 31    |
|                              | 69 | 1    | 54    |
| <b>E-2AcO(m)<sup>b</sup></b> | 20 | 1    | 7.0   |
|                              | 30 | 1    | 17    |
|                              | 49 | 1    | 35    |
| <b>E-2Cl(M)</b>              | 30 | 1    | 0.18  |
|                              | 32 | 1    | 0.38  |
|                              | 35 | 1    | 0.47  |
|                              | 40 | 1    | 0.49  |
|                              | 45 | 1    | 1.3   |
|                              | 50 | 1    | 3.0   |
|                              | 55 | 1    | 4.6   |

|                              |    |      |     |
|------------------------------|----|------|-----|
|                              | 56 | 400  | 10  |
|                              | 56 | 700  | 12  |
|                              | 56 | 1000 | 16  |
|                              | 56 | 1300 | 17  |
|                              | 56 | 1600 | 19  |
|                              | 60 | 1    | 6.1 |
|                              | 64 | 1    | 9.0 |
|                              | 69 | 1    | 14  |
| <i>E-2Cl(m)</i> <sup>b</sup> | 18 | 1    | 17  |
|                              | 20 | 1    | 21  |
|                              | 30 | 1    | 39  |
|                              | 40 | 1    | 60  |

<sup>a</sup> The same values were obtained, within experimental error, from the measures from the crude *E-2AcO(M)+E-2AcO(m)* (4/1) mixture obtained in the preparation of the *E-2AcO* complex (see text).

<sup>b</sup> Measured as the fast reaction by the addition of 0.05 cm<sup>3</sup> of a concentrated solution of the crude palladium complex mixture of *E-2AcO* and *E-2Cl* in CH<sub>2</sub>Cl<sub>2</sub> to 2.5 cm<sup>3</sup> of neat acetic acid.

**Table S2.-** Values of  $k_{obs}$  for the systems studied, as a function of the starting coordination compound, temperature and acetic acid concentration, in toluene solution, or triflic acid in acetic acid solution;  $[Pd] = (5-10) \times 10^{-4}$  M. All the values are the average of 2 to 4 runs.

| Palladium complex       | T /°C | [CH <sub>3</sub> CO <sub>2</sub> H] /M | 10 <sup>3</sup> ×[HTrif] / M | 10 <sup>4</sup> × $k_{obs}$ /s <sup>-1</sup> |
|-------------------------|-------|----------------------------------------|------------------------------|----------------------------------------------|
| <b><i>E</i>-1AcO</b>    | 31    | 16                                     | -                            | 0.51                                         |
|                         | 31    | 16                                     | 1.3                          | 14                                           |
|                         | 31    | 16                                     | 3.8                          | 6.4                                          |
|                         | 31    | 16                                     | 6.4                          | 4.4                                          |
| <b><i>E</i>-1Cl</b>     | 30    | 16                                     | -                            | 0.35                                         |
|                         | 30    | 16                                     | 1.3                          | 51                                           |
|                         | 30    | 16                                     | 3.8                          | 42                                           |
|                         | 30    | 16                                     | 6.4                          | 36                                           |
|                         | 30    | 16                                     | 10                           | 25                                           |
|                         | 30    | 16                                     | 13                           | 23                                           |
| <b><i>E</i>-2AcO(M)</b> | 29    | 16                                     | -                            | 0.23                                         |
|                         | 29    | 12                                     | -                            | 0.15                                         |
|                         | 29    | 8.5                                    | -                            | 0.10                                         |
|                         | 29    | 5.7                                    | -                            | 0.12                                         |
|                         | 40    | 16                                     | -                            | 1.3                                          |
|                         | 40    | 16                                     | 1.5                          | 23                                           |
|                         | 40    | 16                                     | 3.0                          | 13                                           |
|                         | 40    | 16                                     | 6.1                          | 8.2                                          |
|                         | 40    | 16                                     | 9.1                          | 6.1                                          |
|                         | 40    | 16                                     | 12                           | 5.2                                          |
|                         | 40    | 13                                     | -                            | 0.85                                         |
|                         | 40    | 11                                     | -                            | 0.73                                         |
|                         | 40    | 8.0                                    | -                            | 0.61                                         |
|                         | 40    | 5.1                                    | -                            | 0.44                                         |
|                         | 40    | 2.9                                    | -                            | 0.38                                         |
|                         | 50    | 16                                     | -                            | 4.3                                          |
|                         | 50    | 14                                     | -                            | 2.9                                          |
| 50                      | 13    | -                                      | 2.1                          |                                              |
| 50                      | 11    | -                                      | 1.6                          |                                              |
| 50                      | 8.6   | -                                      | 1.4                          |                                              |

|    |     |   |     |
|----|-----|---|-----|
| 60 | 16  | - | 11  |
| 60 | 11  | - | 5.7 |
| 60 | 8.6 | - | 4.9 |
| 60 | 5.7 | - | 3.5 |
| 60 | 2.9 | - | 2.3 |

**FIGURE S1.**— Variation of the value of  $k_{\text{obs}}$  with the concentration of acid in solutions of complex  $E-2\text{AcO}(\text{M})$  in acetic acid/toluene mixtures at different temperatures ( $\blacktriangle$ , 40 °C;  $\blacksquare$ , 60 °C).

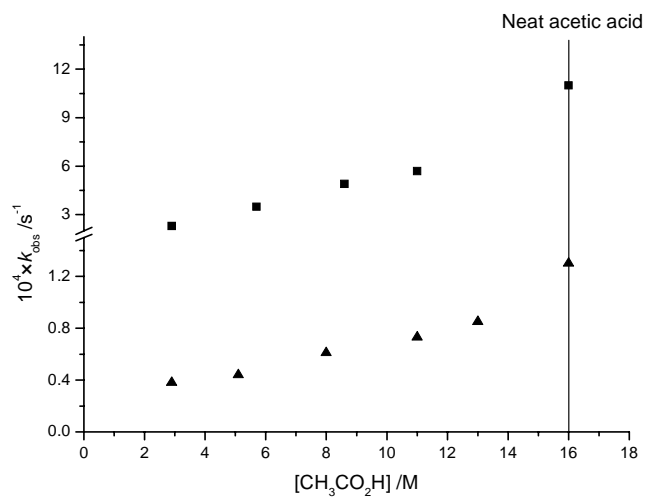

**FIGURE S2.**— Variation of the value of  $k_{\text{obs}}$  for the cyclometallation reaction of  $E-2\text{AcO}(\text{M})$  with the concentration of triflic acid in neat acetic acid at 40 °C.

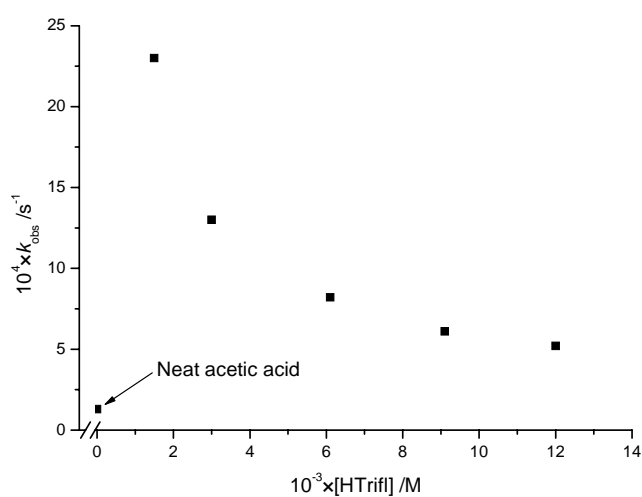

**FIGURE S3.**— Eyring plot for the variation of the rate constants for the cyclometallation reaction of compounds *E*-1AcO (▲), *E*-2AcO(m) (◆) and *E*-2Cl(M) (●) in acetic acid solution.

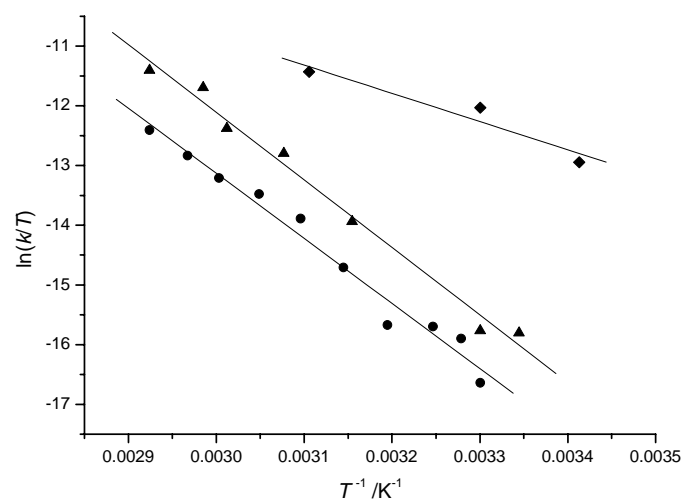

Supplement: b415613g.pdf [file b415613g.pdf]
